# Supplementary material
Source: Springer Nature journal article supplement (https://www.springermedizin.de/resource/supplementary/13045_2009_44_MOESM2_ESM.pdf/9660540)

|            |            |            |            |            |            |            |            |
|------------|------------|------------|------------|------------|------------|------------|------------|
| MSALGAVIAL | LLWGQLFAVD | SGNDVTDIAD | DGCPKPPEIA | HGYVEHSVRY | QCKNYKLR   | EGDGVYTLND | KKQWINKAVG |
| DKLPECEADD | GCPKPPEIAH | GYVEHSVRYQ | CKNYKLRTE  | GDGVYTLNNE | KQWINKAVGD | KLPECEAVCG | KPKNPANPVQ |
| RILGGHLDK  | GSFPWQAKMV | SHHNLTTGAT | LINEQWLLTT | AKNLFNLHSE | NATAKDIAPT | LTLYVGKKQL | VEIEKVVLHP |
| NYSQVDIGLI | KLKQKVSVNE | RVMPICLPSK | DYAEVGRVGY | VSGWGRNANF | KFTDHLKYVM | LPVADQDQCI | RHYEGSTVPE |
| KKTPKSPVGV | QPILNEHTFC | AGMSKYQEDT | CYGDAGSAFA | VHDLLEDTWY | ATGILSFDKS | CAVAEYGVVY | KVTSIQDWWQ |
| KTIAEN     |            |            |            |            |            |            |            |

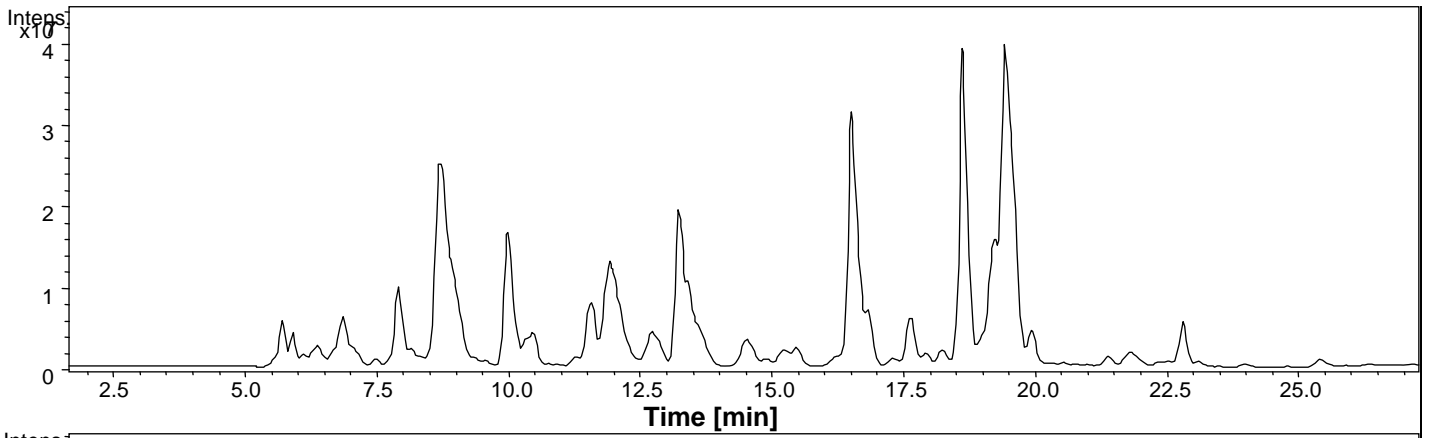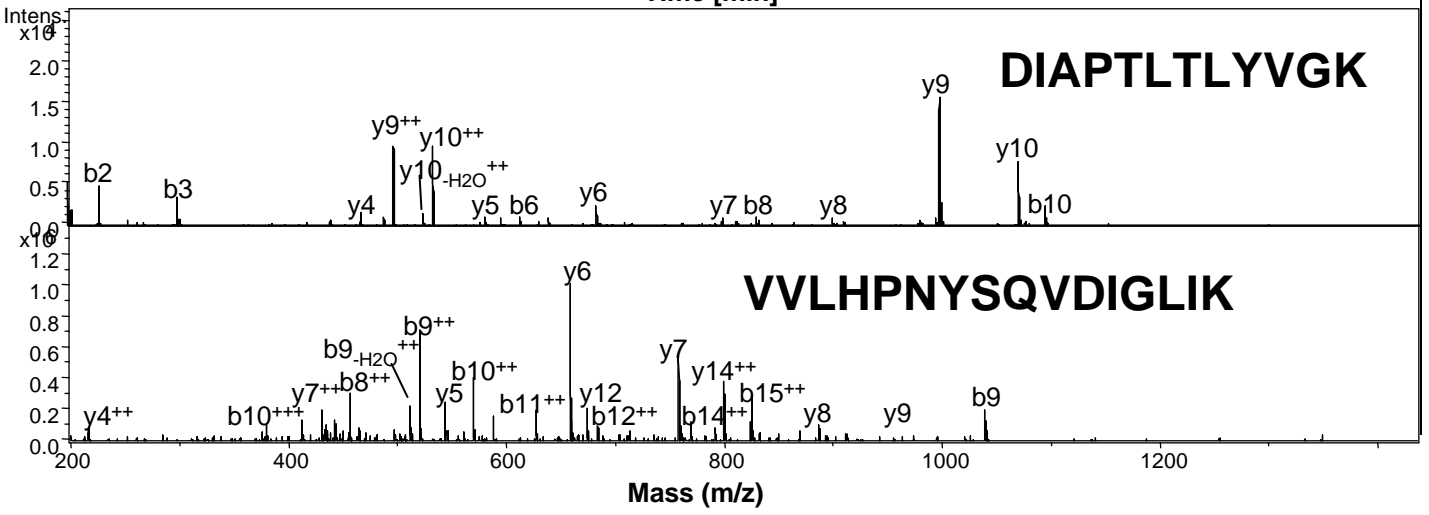

Supplement: MOESM2 [file 9660540]
